# Supplementary material
Source: ML conference proceedings conference paper supplement (https://proceedings.neurips.cc/paper_files/paper/2023/hash/dbb5180957513805ebeea787b8c66ac9-Abstract.html)
Supplement: Supplementary file 1 [file dbb5180957513805ebeea787b8c66ac9-Supplemental-Conference.pdf]

# Appendix

## A Missing Proofs of Section 4

**Lemma 2 (★).** *Let  $(G, c)$  be a delegation graph and let  $(\mathcal{F}, E_y, y)$  be the output of Algorithm 1. Then:*

- (i) *For every  $(G, c)$ , the output of the algorithm is unique, i.e., it does not depend on the choice of the strongly connected component in line 3.*
- (ii)  *$\mathcal{F}$  is laminar, i.e., for any  $X, Y \in \mathcal{F}$  it holds that either  $X \subseteq Y$ ,  $Y \subseteq X$ , or  $X \cap Y = \emptyset$ .*
- (iii) *Branching  $B$  in  $(G, c)$  is min-cost iff (a)  $B \subseteq E_y$ , and (b)  $|B \cap \delta^+(X)| = 1$  for all  $X \in \mathcal{F}, X \subseteq N$ .*
- (iv) *For every  $X \in \mathcal{F}$ , an in-tree  $T$  in  $G[X] = (X, E[X])$ , where  $E[X] = \{(u, v) \in E \mid u, v \in X\}$ , is min-cost iff (a)  $T \subseteq E_y$ , and (b)  $|T \cap \delta^+(Y)| = 1$  for all  $Y \in \mathcal{F}$  such that  $Y \subset X$ .*

*Proof.* Let  $(G, c)$  be a delegation graph and let  $(\mathcal{F}, E_y, y)$  be the output of Algorithm 1.

We start by proving statement (ii). The sets in  $\mathcal{F}$  correspond exactly to those sets with positive  $y$ -value. Assume for contradiction that there exist two sets  $X, Y \in \mathcal{F}$  with  $X \cap Y \neq \emptyset$  and none of the subsets is a subset of the other. Assume without loss of generality that  $X$  was selected before  $Y$  by the algorithm and let  $y_1$  and  $y_2$  be the status of the function  $y$  in each of the two situation. Then, by construction of the algorithm it holds that  $G_1 = (N \cup S, E_{y_1})$  is a subgraph of  $G_2 = (N \cup S, E_{y_2})$ . This is because once an edge is added to the set of tight edges (denoted by  $E_y$ ) it remains in this set. Since  $Y$  is a strongly connected component in  $G_2$  without outgoing edge, it holds that for every  $z \in X \setminus Y$  and  $z' \in X \cap Y$ , the node  $z'$  does not reach  $z$  in  $G_2$ . However, this is a contradiction to the fact that  $X$  is a strongly connected component in the graph  $G_1$ , which concludes the proof of statement (ii).

We now turn to prove statement (i) and already assume that  $\mathcal{F}$  is laminar. We fix an order of the selected strongly connected components in line 3 of the algorithm. Then, suppose that for some other choices in line 3, the algorithm returns some other output  $(\hat{\mathcal{F}}, E_{\hat{y}}, \hat{y})$ . Note that  $\hat{\mathcal{F}} \neq \mathcal{F}$  or  $E_{\hat{y}} \neq E_y$  implies that  $\hat{y} \neq y$ . Thus, it suffices to assume for contradiction that  $\hat{y} \neq y$ . Then there must be a smallest set  $X$ , that has  $y(X) \neq \hat{y}(X)$  (without loss of generality we assume  $y(X) > \hat{y}(X)$ ). Let  $\mathcal{X} = 2^X \setminus \{X\}$  be the set of all strict subsets of  $X$ . Since we defined  $X$  to be of minimal cardinality, we have  $y[\mathcal{X}] = \hat{y}[\mathcal{X}]$ , where  $y[\mathcal{X}]$ , and  $\hat{y}[\mathcal{X}]$  denote the restriction of  $y$  and  $\hat{y}$  to  $\mathcal{X}$ , respectively. Because  $y(X) > 0$ , all children of  $X$  are strongly connected by tight edges with respect to  $y[\mathcal{X}]$  and have no tight edges pointing outside of  $X$ . Now, consider the iteration of the alternative run of the Algorithm 2, in which the algorithm added the last set in  $\mathcal{X} \cup \{X\}$ . Since  $\hat{y}(X) < y(X)$ , for every further iteration of the algorithm, a chosen set  $X' \neq X$  cannot contain any node in  $X$  (because otherwise  $X'$  cannot form a strongly connected component without outgoing edge). However, since the nodes in  $X$  cannot reach a sink via tight edges, this is a contradiction to the termination of the algorithm.

We now prove statement (iii). The plan of attack is the following: First we define a linear program that captures the min-cost branchings in a delegation graph. Second, we dualize the linear program and show that  $y$  (more precisely a minor variant of  $y$ ) is an optimal solution to the dual LP, and third, utilize complementary slackness to prove the claim. For a given delegation graph  $(G, c)$  with  $V(G) = N \cup S$  we define the following linear program, also denoted by (LP):

$$\begin{aligned}
 \min \quad & \sum_{e \in E} c(e)x_e \\
 \sum_{e \in \delta^+(X)} x_e & \geq 1 & \forall X \subseteq N \\
 x_e & \geq 0 & \forall e \in E
 \end{aligned}$$

461 We claim that every branching  $B$  in  $G$  induces a feasible solution to (LP). More precisely, given a  
 462 branching  $B$ , let

$$x_e = \begin{cases} 1 & \text{if } e \in B \\ 0 & \text{if } e \notin B. \end{cases}$$

463 The last constraint is trivially satisfied. Now, assume for contradiction that there exists  $X \subseteq N$  such  
 464 that the corresponding constraint in (LP) is violated. In this case the nodes in  $X$  have no path towards  
 465 some sink node in  $B$ , a contradiction to the fact that  $B$  is a (maximum cardinality) branching. In  
 466 particular, this implies that the objective value of (LP) is at most the minimum cost of any branching  
 467 in  $G$  (in fact the two values are equal, but we do not need to prove this at this point). We continue by  
 468 deriving the dual of (LP), to which we refer to as (DLP):

$$\begin{aligned} \max \quad & \sum_{X \subseteq N} y_X \\ \sum_{X \subseteq N | e \in \delta^+(X)} y_X & \leq c(e) & \forall e \in E \\ y_X & \geq 0 & \forall X \subseteq N \end{aligned}$$

469 Now, let  $y$  be the function returned by Algorithm 1. We define  $\hat{y}$ , which is intuitively  $y$  restricted to  
 470 all subsets on  $N$ , more precisely,  $\hat{y}(X) = y(X)$  for all  $X \subseteq N$ . We claim that  $\hat{y}$  is a feasible solution  
 471 to (DLP). This can be easily shown by induction. More precisely, we fix any  $e \in E$  and show that  
 472 the corresponding constraint in (DLP) is satisfied throughout the execution of the algorithm. At the  
 473 beginning of the algorithm  $y$  (and hence  $\hat{y}$ ) is clearly feasible for (DLP). Now, consider any step  
 474 in the algorithm and let  $X$  be the selected strongly connected component. If  $e \in \delta^+(X)$ , then we  
 475 know that the constraint corresponding to  $e$  is not tight (since  $X$  has no tight edge in its outgoing  
 476 cut). Moreover,  $y$  is only increased up to the point that some edge in  $\delta^+(X)$  becomes tight (and not  
 477 higher than that). Hence, after this round, the constraint for  $e$  is still satisfied. If, on the other hand,  
 478  $e \notin \delta^+(X)$ , then the left-hand-side of  $e$ 's constraint remains equal when  $y(X)$  is increased. Hence,  
 479 the constraint of  $e$  is still satisfied.

480 Next, we claim that there exists a branching  $B$  in  $G$ , such that for the resulting primal solution  $x$ ,  
 481 it holds that  $\sum_{e \in E} c(e)x_e = \sum_{X \subseteq N} \hat{y}(X)$ . The branching  $B$  will be constructed in a top-down  
 482 fashion by moving along the laminar hierarchy of  $\mathcal{F}$ . To this end let  $G_X$  be the contracted graph as  
 483 defined in Algorithm 2. We start by setting  $X = N \cup S$ . Since every node in  $N$  can reach some sink  
 484 via tight edges, we also know that every node in  $G_X$  can reach some sink. Hence, a branching in  $G_X$   
 485 has exactly one edge per node in  $V_X$  that is not a sink. Let's pick such a branching  $B_X$ . We know that  
 486 for every edge in  $B_X = (Y, Z)$  there exists some edge in the original graph  $G$  that is also tight, i.e.,  
 487  $u \in Y$  and  $v \in Z$  such that  $(u, v) \in E_y$ . For every edge in  $B_X$  pick an arbitrary such edge and add  
 488 it to  $B$ . Now, pick an arbitrary node  $Y \in V(G_X)$ . By construction, we know that exactly one edge  
 489 from  $B$  is included in  $\delta^+(Y)$ , call this edge  $(u, v)$ . Then, within the graph  $G_Y$ , there exists exactly  
 490 one node  $Z \in V(G_Y)$ , that contains  $u$ . We are going to search for a  $Z$ -tree within  $G_Y$ . We know that  
 491 such a tree exists since  $G_Y$  is strongly connected by construction. We follow the pattern from before,  
 492 i.e., finding a  $Z$ -tree, mapping the edges back to the original graph (arbitrarily), and then continuing  
 493 recursively. For proving our claim, it remains to show that  $\sum_{e \in E} c(e)x_e = \sum_{X \subseteq N} \hat{y}(X)$ . The  
 494 crucial observation is that, by construction, every set in  $\hat{\mathcal{F}} = \mathcal{F} \setminus \{\{s\} \mid s \in S\}$  is left by exactly one  
 495 edge in  $B$ . Hence, we can partition the set  $\hat{\mathcal{F}}$  into sets  $\bigcup_{e \in B} \hat{F}_e$ , where  $\hat{F}_e = \{X \in \hat{\mathcal{F}} \mid e \in \delta^+(X)\}$ .  
 496 Moreover, observe that every edge in  $B$  is tight. As a result we get that

$$\sum_{e \in B} c(e)x_e = \sum_{e \in B} \sum_{X \in \hat{F}_e} \hat{y}(X) = \sum_{X \subseteq N} \hat{y}(X),$$

497 proving the claim.

498 As a result, note that we found a primal solution  $B$  (precisely, the  $x$  induced by  $B$ ), and a dual  
 499 solution  $\hat{y}$  having the same objective value. By weak duality, we can conclude that both solutions are  
 500 in particular optimal. It only remains to apply complementary slackness to conclude the claim. To this  
 501 end, let  $B$  be a min-cost branching and  $x$  be the induced primal solution. By the argument above we  
 502 know that  $x$  is optimal. Now, for any  $X \subseteq N$  for which  $\hat{y}(X) > 0$  (hence  $X \in \mathcal{F}$ ), complementary  
 503 slackness prescribes that the corresponding primal constraint is tight, i.e.,  $\sum_{e \in \delta^+(X)} x_e = 1$ . Hence,  
 504 the branching corresponding to  $x$  leaves the set  $X$  exactly once, and part (b) of statement (iii) is

satisfied. For statement (a) we apply complementary slackness in the other direction. That is, when  $x_e > 0$ , this implies that the corresponding dual constraint is tight, implying that  $e$  has to be tight with respect to  $\hat{y}$  and therefore also with respect to  $y$  (recall that  $y$  and  $\hat{y}$  only differ with respect to the sink nodes).

We now turn to proving statement (iv). This is done almost analogously to statement (iii). Fix  $X \in \mathcal{F}$ . In the following we argue about the min-cost in-trees in  $G[X]$  and how to characterize these via a linear program. To this end, we add a dummy sink node  $r$  to the graph  $G[X]$  and call the resulting graph  $\hat{G}$ . More precisely,  $\hat{G} = (X \cup \{r\}, E[X] \cup \{(u, r) \mid u \in X\})$ . The cost of any edge  $(u, r)$ ,  $u \in X$  is set to  $c^* := \max_{e \in E(G)} c(e) + 1$ , where it is only important that this value is larger than any other cost in the graph. We define the following LP:

$$\begin{aligned} \min \quad & \sum_{e \in E(\hat{G})} c(e)x_e \\ & \sum_{e \in \delta_{\hat{G}}^+(Z)} x_e \geq 1 & \forall Z \subseteq X \\ & x_e \geq 0 & \forall e \in E(\hat{G}) \end{aligned}$$

For every min-cost in-tree  $T$  in  $G[X]$  we obtain a feasible solution to (LP). To this end, let  $u \in X$  be the sink node of  $T$  and define  $\hat{T} = T \cup \{(u, r)\}$ . Then, translate  $\hat{T}$  to its incidence vector  $x$ . Given this observation, we again derive the dual of (LP), to which we refer to as (DLP):

$$\begin{aligned} \max \quad & \sum_{Z \subseteq X} y_Z \\ & \sum_{Z \subseteq X \mid e \in \delta_{\hat{G}}^+(Z)} y_Z \leq c(e) & \forall e \in E(\hat{G}) \\ & y_Z \geq 0 & \forall Z \subseteq X \end{aligned}$$

Now, let  $y$  be the output of Algorithm 1 for the original graph  $G$ . We derive  $\hat{y} : 2^X \rightarrow \mathbb{R}$  as follows:

$$\hat{y}(Z) = \begin{cases} y(Z) & \text{if } Z \subset X \\ c^* - \max_{u \in X} \sum_{Z \subset X \mid e \in \delta_{\hat{G}}^+(Z)} y(Z) & \text{if } Z = X \end{cases}$$

First, analogously to (iii), it can be verified that  $\hat{y}$  is a feasible solution to (DLP). Moreover, again analogously to (iii), there exists some min-cost  $r$ -tree in  $\hat{G}$  and a corresponding primal solution  $x$ , such that  $\sum_{e \in E(\hat{G})} c(e)x_e = \sum_{Z \subseteq X} \hat{y}(Z)$ . (This tree is derived by first choosing a tight edge towards the dummy root node  $r$  and then again recurse over the laminar family  $\mathcal{F}$  restricted to  $X$ .) This implies by weak duality that  $\hat{y}$  is an optimal solution to (DLP) and any min-cost  $r$ -tree in  $\hat{G}$  is an optimal solution to (LP). As a result, we can again apply complementary slackness in both directions: Let  $T$  be a min-cost in-tree in  $G[X]$  with sink node  $u \in X$ . Then let  $\hat{T} = T \cup \{(u, r)\}$  be the corresponding min-cost  $r$ -tree in  $\hat{G}$  and  $x$  be the corresponding incidence vector. Then, complementary slackness implies that for any  $e \in E[X]$  for which  $x_e > 0$  (and hence  $e \in T$ ), it holds that the corresponding constraint in (DLP) is tight with respect to  $\hat{y}$  (and also  $y$ ). This implies that  $e \in E_y$ . On the other hand, for any  $Z \subset X$ , if  $\hat{y}_Z > 0$ , and hence  $X \in \mathcal{F}$ , complementary slackness prescribes that the corresponding primal constraint is tight, and hence  $|T \cap \delta_{G[X]}^+(Z)| = 1$ , concluding the proof.  $\square$

For the proof of the next theorem, we first explain how to compute the absorbing probabilities of an absorbing Markov chain  $(G, P)$  and show a related lemma that we need in Appendix C. W.l.o.g. we assume that the states  $V(G)$  are ordered such that the non-absorbing states  $N$  come first and the absorbing states  $S$  last. We can then write the transition matrix as

$$P = \begin{bmatrix} D & C \\ 0 & I_{|S|} \end{bmatrix},$$

where  $D$  is the  $|N| \times |N|$  transition matrix from non-absorbing states to non-absorbing states and  $C$  is the  $|N| \times |S|$  transition matrix from non-absorbing states to absorbing states.  $I_{|S|}$  denotes the  $|S| \times |S|$  identity matrix. The absorbing probability of an absorbing state  $s \in S$ , when starting a random walk in a state  $v \in N$  is then given as the entry in the row corresponding to  $v$  and the column corresponding to  $s$  in the  $|N| \times |S|$  matrix  $(I_{|N|} - D)^{-1}C$  [Grinstead and Snell, 1997].

540 **Lemma A.1.** *Adding a self-loop to a non-absorbing state  $v$  with probability  $p$  and scaling all other*  
 541 *transition probabilities from that state by  $1 - p$  does not change the absorbing probabilities of an*  
 542 *absorbing Markov-chain  $(G, P)$ .*

543 *Proof.* Let  $(D, C)$  and  $(D', C')$  be the transition matrices of the absorbing Markov chain before and  
 544 after adding the self-loop. Let  $\mathbf{d}_v, \mathbf{d}'_v, \mathbf{c}_v, \mathbf{c}'_v$  be the rows of  $D, D', C, C'$ , corresponding to state  $v$   
 545 respectively. Then

$$\begin{aligned}\mathbf{d}'_v &= (1 - p)\mathbf{d}_v + p\mathbf{e}_v^\top, \\ \mathbf{c}'_v &= (1 - p)\mathbf{c}_v\end{aligned}$$

546 and  $\mathbf{d}'_u = \mathbf{d}_u$  and  $\mathbf{c}'_u = \mathbf{c}_u$  for all  $u \neq v$ .

We want to show that  $(I_{|N|} - D)^{-1}C = (I_{|N|} - D')^{-1}C'$ . Let  $Z = (I_{|N|} - D)^{-1}C$ . Then  
 $Z = (I_{|N|} - D')^{-1}C'$  if and only if  $Z = D'Z + C'$ . Notice, that only the row corresponding to  $v$  in  
 $D'$  and  $C'$  differ from  $D$  and  $C$  and therefore for all  $u \neq v$

$$\mathbf{z}_u = \mathbf{d}_u Z + \mathbf{c}_u = \mathbf{d}'_u Z + \mathbf{c}'_u,$$

547 where  $\mathbf{z}_u$  is the row of  $Z$  corresponding to  $u$ . The only thing left to show is  $\mathbf{z}_v = \mathbf{d}'_v Z + \mathbf{c}'_v$ . We have

$$\begin{aligned}\mathbf{d}'_v Z + \mathbf{c}'_v &= ((1 - p)\mathbf{d}_v + p\mathbf{e}_v^\top)Z + (1 - p)\mathbf{c}_v \\ &= (1 - p)\mathbf{d}_v Z + p\mathbf{e}_v^\top Z + (1 - p)\mathbf{c}_v \\ &= (1 - p)(\mathbf{d}_v Z + \mathbf{c}_v) + p\mathbf{e}_v^\top Z \\ &= (1 - p)\mathbf{z}_v + p\mathbf{z}_v && (\text{since } DZ + C = Z) \\ &= \mathbf{z}_v,\end{aligned}$$

548 which concludes the proof. □

549 **Theorem 4 (★).** *Algorithm 2 returns MIXED BORDA BRANCHING and runs in  $\text{poly}(n)$ .*

550 *Proof.* We start by showing by induction that the given interpretation of the weight function on the  
 551 nodes is correct, i.e., for any  $v \in N$ ,  $t_X(v)$  corresponds to the number of min-cost  $v$ -trees in the  
 552 graph  $G[X]$ . The claim is clearly true for any singleton, since  $t_{\{v\}}(v) = 1$  and the number of  $v$ -trees  
 553 in  $(\{v\}, \emptyset)$  is one, i.e., the empty set is the only  $v$ -trees. Now, we fix some  $X \in \mathcal{F}'$  and assume that  
 554 the claim is true for all children of  $X$ . In the following, we fix  $v \in X$  and argue that the induction  
 555 hypothesis implies that the claim holds for  $t_X(v)$  as well.

556 For any node  $u \in X$ , let  $Y_u \in \mathcal{F}$  be the child of  $X$  containing node  $u$ . Moreover, let  $\mathcal{T}_v^*(G[X])$  (or  
 557 short  $\mathcal{T}_v^*$ ) be the set of min-cost  $v$ -trees in  $G[X]$ , and  $\mathcal{T}_{Y_v}(G_X)$  (or short  $\mathcal{T}_{Y_v}$ ) be the set of  $Y_v$ -trees in  
 558  $G_X$ . Lastly, for any  $u \in X$ , let  $\mathcal{T}_u^*(G[Y_u])$  be the set of min-cost  $u$ -trees in  $G[Y_u]$ . In the following,  
 559 we argue that there exists a many-to-one mapping from  $\mathcal{T}_v^*$  to  $\mathcal{T}_{Y_v}$ . Note that, by statement (iv)  
 560 in Lemma 2, every min-cost in-tree  $T$  in  $G[X]$  (hence,  $T \in \mathcal{T}_v^*$ ) leaves every child of  $X$  exactly  
 561 once via a tight edge. Therefore, there exists a natural mapping to an element of  $\mathcal{T}_{Y_v}$  by mapping  
 562 every edge in  $T$  that connects two children of  $X$  to their corresponding edge in  $G_X$ . More precisely,  
 563  $\hat{T} = \{(Y, Y') \in E_X \mid T \cap \delta^+(Y) \cap \delta^-(Y') \neq \emptyset\}$  is an  $Y_v$ -tree in  $G_X$  and hence an element of  $\mathcal{T}_{Y_v}$ .

Next, we want to understand how many elements of  $\mathcal{T}_v^*$  map to the same element in  $\mathcal{T}_{Y_v}$ . Fix any  
 $\hat{T} \in \mathcal{T}_{Y_v}$ . We can construct elements of  $\mathcal{T}_v^*$  by combining (an extended version of)  $\hat{T}$  with min-cost  
in-trees within the children of  $X$ , i.e., with elements of the sets  $\mathcal{T}_u^*(G[Y_u])$ ,  $u \in X$ . More precisely,  
for any edge  $(Y, Y') \in \hat{T}$ , we can independently chose any of the edges in  $(u, u') \in E_Y \cap (Y \times Y')$   
and combine it with any min-cost  $u$ -tree in the graph  $G[Y]$ . This leads to

$$\left( \prod_{(Y, Y') \in \hat{T}} \sum_{(u, u') \in E_Y \cap (Y \times Y')} t_Y(u) \right) t_{Y_v}(v) = \left( \prod_{(Y, Y') \in \hat{T}} w_X(Y, Y') \right) \cdot t_{Y_v}(v)$$

many different elements from  $\mathcal{T}_v^*$  that map to  $\hat{T} \in \mathcal{T}_{Y_v}$ . Hence,

$$|\mathcal{T}_v^*| = \sum_{\hat{T} \in \mathcal{T}_{Y_v}} \prod_{(Y, Y') \in \hat{T}} w_X(Y, Y') \cdot t_{Y_v}(v) = w_X(\mathcal{T}_{Y_v}) \cdot t_{Y_v}(v) = t_X(v),$$

564 where the last inequality follows from the definition of  $t_X(v)$  in the algorithm. This proves the  
 565 induction step, i.e.,  $t_X(v)$  corresponds to the number of min-cost  $v$ -trees in the graph  $G[X]$ .

Now, let  $X = N \cup S$ , i.e., we are in the last iteration of the algorithm. Due to an analogous reasoning as before, there is a many-to-one mapping from the min-cost branchings in  $G$  to branchings in  $G_X$ . More precisely, for every branching  $B \in \mathcal{B}_{Y, \{s\}}(G_X)$ , there exist

$$\prod_{(Y, Y') \in B} w_X(Y, Y') = w_X(B)$$

branchings in  $G$  that map to  $B$ . Hence, by the Markov chain tree theorem (Lemma 3), we get

$$A_{v,s} = Q_{v,s} = \frac{\sum_{B \in \mathcal{B}_{Y_v, \{s\}}(G_X)} w_X(B)}{\sum_{B \in \mathcal{B}(G_X)} w_X(B)} = \frac{\sum_{B \in \mathcal{B}_{v,s}^*(G)} 1}{\sum_{B \in \mathcal{B}^*(G)} 1},$$

where  $(G'_X, P)$  is the Markov chain corresponding to  $G_X$  and  $Q = \lim_{\tau \rightarrow \infty} \frac{1}{\tau} \sum_{i=0}^{\tau} P^i$ . This equals the definition of MIXED BORDA BRANCHING.

Lastly, we argue about the running time of the algorithm. For a given delegation graph  $(G, c)$ , let  $n = V(G)$ , i.e., the number of voters. Algorithm 1 can be implemented in  $\mathcal{O}(n^3)$ . That is because, the while loop runs for  $\mathcal{O}(n)$  iterations (the laminar set family  $\mathcal{F}$  can have at most  $2n - 1$  elements), and finding all strongly connected components in a graph can be done in  $\mathcal{O}(n^2)$  (e.g., with Kosaraju's algorithm [Hopcroft et al., 1983]). Coming back to the running time of Algorithm 2, we note that the do-while loop runs for  $\mathcal{O}(n)$  iterations, again, due to the size of  $\mathcal{F}'$ . In line 7, the algorithm computes  $\mathcal{O}(n)$  times the number of weighted spanning trees with the help of Lemma 1 (Tutte [1948]). Hence, the task is reduced to calculating the determinant of a submatrix of the laplacian matrix. Computing an integer determinant can be done in polynomial time in  $n$  and  $\log(M)$ , if  $M$  is an upper bound of all absolute values of the matrix<sup>9</sup>. Note, that all values in every Laplacian (the out-degrees on the diagonals and the multiplicities in the other entries) as well as the results of the computation are upper-bounded by the total number of branchings in the original graph  $G$  (this follows from our argumentation about the interpretation of  $t_X(v)$  in the proof of Theorem 4), hence in particular by  $n^n$ . Therefore, the running time of each iteration of the do-while loop is polynomial in  $n$ . In the final step we compute the absorbing probabilities of the (scaled down version) of the weighted graph  $(G_X, w_X)$  (where  $X = N \cup S$ ). For that, we need to compute the inverse of a  $\mathcal{O}(n) \times \mathcal{O}(n)$  matrix, which can be done using the determinant and the adjugate of the matrix. Computing these comes down to computing  $\mathcal{O}(n^2)$  determinants, for which we argued before that it is possible in polynomial time<sup>10</sup>. Summarizing, this gives us a running time of Algorithm 1 in  $\mathcal{O}((n^7 \log(n) + n^4 \log(n \log(n))) * (\log^2 n + (\log(n \log(n)))^2))$ .  $\square$

## B Further Remarks on Section 5

**Alternative Interpretation of Algorithm 2** We stated Algorithm 2 in terms of counting min-cost branchings. There exists a second natural interpretation that is closer to the definition of the RANDOM WALK RULE, in which we want to compute the limit of the absorbing probabilities of a parametric Markov chain. We give some intuition on this reinterpretation of the algorithm with the example in Figure 2, and later extend this interpretation to a larger class of parametric Markov chains.

Intuitively speaking, every set  $X \in \mathcal{F}$  in the Markov chain  $(G, P^{(\varepsilon)})$  corresponding to the delegation graph  $G$  is a strongly connected component whose outgoing edges have an infinitely lower probability than the edges inside of  $X$  as  $\varepsilon$  approaches zero. We are therefore interested in the behavior of an infinite random walk in  $G[X]$ . While in the branching interpretation, the node weight  $t_X(v)$  can be interpreted as the number of min-cost  $v$ -arborescences in  $G[X]$ , in the Markov chain interpretation we think of  $t_X(v)$  as an indicator of the relative time an infinite random walk spends in  $v$  (or the relative number of times  $v$  is visited) in the Markov chain given by the strongly connected graph  $G[X]$ . Consider the example iteration depicted in Figure 2a, where we are given an unprocessed  $X \in \mathcal{F}$  whose children  $Y_1, Y_2$  are all processed. When contracting  $Y_1$  and  $Y_2$  the weights on the edges should encode how likely a transition is from one set to another, which is achieved by summing over the relative time spent in each node with a corresponding edge. We then translate the resulting

<sup>9</sup>More precisely, it can be computed in  $\mathcal{O}((n^4 \log(nM) + n^3 \log^2(nM)) * (\log^2 n + (\log \log M)^2))$  [Gathen and Gerhard, 2013]

<sup>10</sup>We argued this only for integer matrices, but we can transform the rational matrix into an integer one by scaling it up by a factor which is bounded by  $n^n$ .

graph (Figure 2b) into a Markov chain and again compute the relative time spend in each node. This computation is equivalent to calculating the sum of weights of all in-trees (up to a scaling factor, see Theorem 3). Indeed, we get a ratio of one to three for the time spend in  $Y_1$  and  $Y_2$ . To compute  $t_X(v)$  we multiply the known weight  $t_{Y_v}(v)$  by the newly calculated weight of  $Y_v$ . In the example this means that since we know, we spend three times as much time in  $Y_2$  as in  $Y_1$  all weights of nodes in  $Y_2$  should be multiplied by three (see Figure 2c).

**Extension of Algorithm 2** In addition, we remark that our algorithm could be extended to a larger class of parametric Markov chains, namely, to all Markov chains  $(G, P^{(\varepsilon)})$ , where  $G$  is a graph in which every node has a path to some sink node, and, for every  $e \in E(G)$ ,  $P_e^{(\varepsilon)}$  is some rational fraction in  $\varepsilon$ , i.e.,  $\frac{f_e(\varepsilon)}{g_e(\varepsilon)}$ , where both  $f_e$  and  $g_e$  are polynomials in  $\varepsilon$  with positive coefficients.<sup>11</sup> Now, we can construct a cost function  $c$  on  $G$ , by setting  $c(e) = x_e - z_e + 1$ , where  $x_e$  is the smallest exponent in  $f_e(\varepsilon)$  and  $z_e$  is the smallest exponent in  $g_e(\varepsilon)$ . Note that, if  $c(e) < 1$ , then the Markov chain cannot be well defined for all  $\varepsilon \in (0, 1]$ . Now, we run Algorithm 2 for the delegation graph  $(G, c)$  with the only one difference, i.e., the weight function  $w_X$  also has to incorporate the coefficients of the polynomials  $f_e(\varepsilon)$  and  $g_e(\varepsilon)$ . More precisely, we define for every  $e \in E$ , the number  $q_e$  as the ratio between the coefficient corresponding to the smallest exponent in  $f_e$  and the coefficient corresponding to the smallest exponent in  $g_e$ . Then, we redefine line 4 in the algorithm to be

$$w_X(Y, Y') \leftarrow \sum_{(u,v) \in E_Y \cap (Y \times Y')} t_Y(u) \cdot q_{(u,v)}.$$

One can then verify with the same techniques as in Section 4 and Section 5, that this algorithm returns the outcome of the above defined class of Markov chains.

## C Missing Proofs and Further Results of Section 6

**Theorem 6 (★).** *The RANDOM WALK RULE satisfies anonymity.*

*Proof.* Since  $\sigma$  is a graph automorphism, we know that for all  $v \in V(G)$  it holds that  $|\delta^+(v)| = |\delta^+(\sigma(v))|$  and  $c((v, w)) = c((\sigma(v), \sigma(w)))$  for any edge  $(v, w) \in \delta^+(v)$ . In the corresponding Markov chain  $M_\varepsilon$  we therefore get  $P_{(v,w)}^{(\varepsilon)} = P_{(\sigma(v), \sigma(w))}^{(\varepsilon)}$  (see Equation 1). Since through the bijection between the edges of the graph, we also get a bijection between all walks in the graph  $\mathcal{W}$  and for every  $s \in S$  and walk in  $\mathcal{W}[s, v]$  there is a corresponding walk in  $\mathcal{W}[\sigma(v), \sigma(s)]$  of the same probability. Therefore we have

$$A_{v,s} = \lim_{\varepsilon \rightarrow 0} \sum_{W \in \mathcal{W}[v,s]} \prod_{e \in W} P_e^{(\varepsilon)} = \lim_{\varepsilon \rightarrow 0} \sum_{W \in \mathcal{W}[\sigma(v), \sigma(s)]} \prod_{e \in W} P_e^{(\varepsilon)} = A_{\sigma(v), \sigma(s)} \quad ,$$

which concludes the proof.  $\square$

**Theorem 7 (★).** *The RANDOM WALK RULE satisfies copy-robustness.*

*Proof.* Let  $(G, c)$ ,  $v$ ,  $(\hat{G}, c)$ ,  $A$ ,  $\hat{A}$  and  $S_v$  be defined as in the definition of copy-robustness. Let  $(\mathcal{F}, y)$  and  $(\hat{\mathcal{F}}, \hat{y})$  be the set families and functions returned by Algorithm 1 for  $G$  and  $\hat{G}$ , respectively. In this proof, we restrict our view to the subgraphs of only tight edges, denoted by  $G_y = (N \cup S, E_y)$  and  $\hat{G}_{\hat{y}} = (N \setminus \{v\} \cup V \cup \{v\}, E_{\hat{y}})$ , respectively. Note, that this does not change the result of the RANDOM WALK RULE, since it is shown to be equal to MIXED BORDA BRANCHING, which only considers tight edges (in the contracted graph) itself.

First, we observe that the set  $S_v$  is exactly the subset of  $S$  reachable by  $v$  in  $G_y$ . This is because the assignment  $A$  returned by the RANDOM WALK RULE is given as the absorbing probability of a Markov chain on the graph  $(G_X, w_X)$  with  $X = N \cup S$ , computed by Algorithm 2. The graph is constructed from  $G_y$  by a number of contractions, which do not alter reachability, i.e. for  $s \in S$  the node  $\{s\}$  is reachable from the node  $Y_v$  containing  $v$  in  $G_X$  exactly if  $s$  is reachable from  $v$  in  $G_y$ . Since all edge weights  $w_X$  are strictly positive, in the corresponding Markov chain all transition probabilities on the edges of  $G_X$  are strictly positive as well. This gives  $\{s\}$  a strictly positive absorbing probability when starting a random walk in  $Y_v$  exactly if  $s$  is reachable from  $v$  in  $G_y$ .

<sup>11</sup>This class is reminiscent of a class of parametric Markov chains studied by Hahn et al. [2011].

Our next observation is that  $\hat{\mathcal{F}} = \mathcal{F} \setminus \{Y \in \mathcal{F} \mid v \in Y\} \cup \{\{v\}\}$ ,  $\hat{y}(\{v\}) = 1$  and  $y(Y) = \hat{y}(Y)$  for all  $Y \in \hat{\mathcal{F}} \setminus \{\{v\}\}$ . Consider the computation of  $\mathcal{F}$  in Algorithm 1. Since the output is unique (see Lemma 2 statement (i)), we can assume without loss of generality that after initializing  $\mathcal{F}$ , all sets in  $\{Y \in \mathcal{F} \mid v \notin Y\}$  are added to  $\mathcal{F}$  first and then the remaining sets  $\{Y \in \mathcal{F} \mid v \in Y\}$ . In  $\hat{G}$ , the only edges missing are the outgoing edges from  $v$ , therefore, when applying Algorithm 1 to  $\hat{G}$  all sets in  $\{Y \in \mathcal{F} \mid v \notin Y\}$  can be added to  $\hat{\mathcal{F}}$  first (with  $\hat{y}(Y) = y(Y)$ ). Note, that the set  $\{v\}$  with  $y(\{v\}) = 1$  was added to  $\hat{\mathcal{F}}$  in the initialization. We claim, that the algorithm terminates at that point. Suppose not, then there must be another strongly connected component  $X \subseteq N$  with  $\delta^+(X) \cap E_{\hat{y}} = \emptyset$ . If  $v \in X$  then since  $v$  has no outgoing edges  $X = \{v\}$ , which is already in  $\mathcal{F}$ . If  $v \notin X$  then  $X$  would have already been added.

With these two observations, we can show the following claim: For every casting voter  $s \in S \setminus S_v$  the voting weight remains equal, when  $v$  turns into a casting voter, i.e.,  $\pi_s(A) = \pi_s(\hat{A})$ . Fix  $s \in S \setminus S_v$  and let  $U \subset N$  be the set of nodes not reachable from  $v$  in  $G_y$ . We know that  $\hat{\mathcal{F}} = \mathcal{F} \setminus \{Y \in \mathcal{F} \mid v \in Y\} \cup \{v\}$ , which implies that for every node  $u \in U$  the sets containing  $u$  are equal in  $\mathcal{F}$  and  $\hat{\mathcal{F}}$ , i.e.,  $\{Y \in \mathcal{F} \mid u \in Y\} = \{Y \in \hat{\mathcal{F}} \mid u \in Y\}$ . Therefore, the outgoing edges from any  $u \in U$  are equal in  $G_y$  and  $\hat{G}_{\hat{y}}$ . Since  $\hat{\mathcal{F}} \subseteq \mathcal{F}$ , the edges in  $\hat{G}_{\hat{y}}$  are a subset of the edges in  $G_y$  and therefore the set  $U$  is not reachable from  $v$  in  $\hat{G}_{\hat{y}}$ . When translating  $\hat{G}_{\hat{y}}$  into the Markov chain  $(\hat{G}_{\hat{y}}, \hat{P}^{(\varepsilon)})$  (see Equation 1), we get for the probability of any tight out-edge  $e$  of  $u$  and any  $\varepsilon > 0$ , that  $P_e^{(\varepsilon)} = \hat{P}_e^{(\varepsilon)}$ , where  $P^{(\varepsilon)}$  is the transition matrix induced by the original graph  $G_y$ . In the following we argue about the set of walks in  $G_y$  and  $\hat{G}_{\hat{y}}$ . To this end we define for every  $u \in N$ , the set  $\mathcal{W}[u, s]$  ( $\hat{\mathcal{W}}[u, s]$ , respectively) as the set of walks in  $G_y$  (in  $\hat{G}_{\hat{y}}$ , respectively) that start in  $u$  and end in sink  $s$ . Since all walks from any  $u \in U$  to  $s$  contain only outgoing edges from nodes in  $U$ , we have  $\hat{\mathcal{W}}[u, s] = \mathcal{W}[u, s]$ . For any other voter  $w \in N \setminus U$  we have  $\hat{\mathcal{W}}[w, s] = \mathcal{W}[w, s] = \emptyset$  and therefore

$$\pi_s(\hat{A}) = 1 + \sum_{u \in U} \lim_{\varepsilon \rightarrow 0} \sum_{\hat{W} \in \hat{\mathcal{W}}[u, s]} \prod_{e \in \hat{W}} P_e^{(\varepsilon)} = 1 + \sum_{u \in U} \lim_{\varepsilon \rightarrow 0} \sum_{W \in \mathcal{W}[u, s]} \prod_{e \in W} P_e^{(\varepsilon)} = \pi_s(A) \quad ,$$

which concludes the proof of the claim.

Summarizing, we know that for any casting voter  $s \in S \setminus S_v$  we have  $\pi_s(A) = \pi_s(\hat{A})$ , which directly implies that  $\sum_{s \in S_v} \pi_s(A) = \pi_v(\hat{A}) + \sum_{s \in S_v} \pi_s(\hat{A})$ .  $\square$

**Theorem 8 (★).** *The RANDOM WALK RULE satisfies confluence.*

*Proof.* Before proving the claim, we introduce notation. For any walk  $W$  in some graph  $G$ , and some node  $v \in V(G)$ , we define  $W[v]$  to be the subwalk of  $W$  that starts at the first occasion of  $v$  in  $W$ . For two nodes  $u, v \in V(G)$ , we define  $W[u, v]$  to be the subwalk of  $W$  that starts at the first occasion of  $u$  and ends at the first occasion of  $v$ . (Note that  $W[v]$  and  $W[u, v]$  might be empty.) Now, for a set of walks  $\mathcal{W}$  and  $u, v, s \in V(G)$ , we define  $\mathcal{W}[v] = \{W[v] \mid W \in \mathcal{W}\}$  and  $\mathcal{W}[u, v] = \{W[u, v] \mid W \in \mathcal{W}\}$ . Lastly, we define  $\mathcal{W}[u, v, s] = \{W \in \mathcal{W} \mid v \in W[u, s]\}$ . We usually interpret a walk  $W$  as a sequence of nodes. In order to facilitate notation, we abuse notation and write  $v \in W$  for some node  $v \in V(G)$  in order to indicate that  $v$  appears in  $W$ , and for an edge  $e \in E(G)$ , we write  $e \in W$  to indicate that tail and head of  $e$  appear consecutively in  $W$ .

For the remainder of the proof we fix  $\mathcal{W}$  to be the set of walks in the input delegation graph  $G$  starting in some node from  $N$  and ending in some sink node  $S$ . Moreover, let  $G_X$  be the graph at the end of Algorithm 2, i.e.,  $G_X$  for  $X = N \cup S$ . We fix  $\hat{\mathcal{W}}$  to be the set of walks which start in some node of  $G_X$  and end in some sink node of  $G_X$  (which are exactly the nodes in  $\{\{s\} \mid s \in S\}$ ).

In the following, we define for every  $v \in N$  a probability distribution  $f_v : \mathcal{W}[v] \rightarrow [0, 1]$ , such that it witnesses the fact that the RANDOM WALK RULE is confluent. To this end, we define a mapping  $\gamma_v : \hat{\mathcal{W}}[Y_v] \rightarrow \mathcal{W}[v]$ , where  $Y_v$  is the node in  $G_X$  that contains  $v$ . Given a walk  $\hat{W} \in \hat{\mathcal{W}}[Y_v]$ , we construct  $\gamma_v(\hat{W}) \in \mathcal{W}[v]$  as follows: Let  $\hat{W} = Y^{(1)} \dots Y^{(k)}$ . By construction of  $G_X$  we know that for every  $i \in \{1, \dots, k\}$ , the fact that  $(Y^{(i)}, Y^{(i+1)}) \in E_X$  implies that there exists  $(b^{(i)}, a^{(i+1)}) \in E$  with  $b^{(i)} \in Y^{(i)}$  and  $a^{(i+1)} \in Y^{(i+1)}$ . Moreover, we define  $a^{(1)} = v$  and  $b^{(n)} = s$ , where  $\{s\} = Y^{(k)}$ . Under this construction it holds that  $a^{(i)}, b^{(i)} \in Y^{(i)}$  for all  $i \in \{1, \dots, k\}$ , but the two nodes may differ. Therefore, we insert subwalks  $W^{(i)}$  connecting  $a^{(i)}$  to  $b^{(i)}$  by using only

678 nodes in  $Y^{(i)}$  and visiting each of these nodes at least once. The final walk  $\gamma_v(\hat{W})$  is then defined by  
 679  $(a^{(1)}, W^{(1)}, b^{(1)}, \dots, a^{(n)}, W^{(n)}, b^{(n)})$ . We remark that this mapping is injective, and it holds that  
 680  $\hat{W}$  visits some node  $Y \in V(G_X)$  if and only if  $\gamma_v(\hat{W})$  visits all nodes in  $Y$ .

Recall that the assignment  $A$  of the RANDOM WALK RULE can be computed via a Markov chain  $(G'_X, P)$  derived from the contracted graph  $(G_X, w_X)$  (see Section 4 and Section 5), where  $G'_X$  is derived from  $G_X$  by adding self-loops. In Lemma A.1 we show that introducing (and thus removing) self-loops to states in an absorbing Markov chain does not change its absorbing probabilities. We retrieve the Markov chain  $(G_X, \hat{P})$  by removing all self loops of all voters in  $N$  and rescaling the other probabilities accordingly. We then make use of this Markov chain in order to define  $f_v$  over  $\mathcal{W}[v]$ . That is, for any  $W \in \mathcal{W}[v]$  let

$$f_v(W) = \begin{cases} \prod_{e \in \hat{W}} \hat{P}_e & \text{if there exists } \hat{W} \in \hat{\mathcal{W}}[Y_v] \text{ such that } \gamma_v(\hat{W}) = W \\ 0 & \text{else.} \end{cases}$$

681 Note that, the above expression is well defined since  $\gamma_v$  is injective.

In the remainder of the proof, we show that  $f_v$  witnesses the confluence of the RANDOM WALK RULE. First, we show that  $f_v$  is indeed consistent with the assignment  $A$  returned by RANDOM WALK RULE. That is, for any  $v \in N$  and  $s \in S$  it holds that

$$\mathbb{P}_{W \sim f_v}[s \in W] = \sum_{W \in \mathcal{W}[v, s]} f_v(W) = \sum_{\hat{W} \in \hat{\mathcal{W}}[Y_v, \{s\}]} \prod_{e \in \hat{W}} \hat{P}_e = A_{v, s} \quad .$$

682 The second equality comes from the fact that  $\gamma_v$  is injective and exactly those walks in  $\hat{\mathcal{W}}[Y_v, \{s\}]$   
 683 are mapped by  $\gamma_v$  to walks in  $\mathcal{W}[v, s]$ . Moreover, all walks in  $\mathcal{W}[v, s]$  that have no preimage  
 684 in  $\hat{\mathcal{W}}[Y_v, \{s\}]$  are zero-valued by  $f_v$ . The last equality comes from the fact that  $A_{v, s}$  equals the  
 685 probability that the Markov chain  $(G'_X, P)$  (equivalently,  $(G_X, \hat{P})$ ) reaches  $\{s\}$  if started in  $Y_v$  (see  
 686 Section 4 and Section 5).

687 We now turn to the second condition on the family of probability distributions  $f_v, v \in N$ . That is, for  
 688 every  $u, v \in N, s \in S$  it holds that

$$\begin{aligned} \mathbb{P}_{W \sim f_u}[v \in W \wedge s \in W] &= \sum_{W \in \mathcal{W}[u, v, s]} f_u(W) = \sum_{\hat{W} \in \hat{\mathcal{W}}[Y_u, Y_v, \{s\}]} \prod_{e \in \hat{W}} \hat{P}_e \\ &= \sum_{\hat{W} \in \hat{\mathcal{W}}[Y_u, Y_v, \{s\}]} \left( \prod_{e \in \hat{W}[Y_u, Y_v]} \hat{P}_e \right) \left( \prod_{e \in \hat{W}[Y_v, \{s\}]} \hat{P}_e \right) \\ &= \left( \sum_{\hat{W} \in \hat{\mathcal{W}}[Y_u, Y_v]} \prod_{e \in \hat{W}} \hat{P}_e \right) \cdot \left( \sum_{\hat{W} \in \hat{\mathcal{W}}[Y_v, \{s\}]} \prod_{e \in \hat{W}} \hat{P}_e \right) \\ &= \left( \sum_{s' \in S} \sum_{\hat{W} \in \hat{\mathcal{W}}[Y_u, Y_v, \{s'\}]} \prod_{e \in \hat{W}} \hat{P}_e \right) \cdot \left( \sum_{\hat{W} \in \hat{\mathcal{W}}[Y_v, \{s\}]} \prod_{e \in \hat{W}} \hat{P}_e \right) \\ &= \left( \sum_{s' \in S} \sum_{W \in \mathcal{W}[u, v, s']} f_u(W) \right) \cdot \left( \sum_{W \in \mathcal{W}[v, s]} f_v(W) \right) \\ &= \mathbb{P}_{W \sim f_u}[v \in W] \cdot \mathbb{P}_{W \sim f_v}[s \in W]. \end{aligned}$$

689 The second equality follows from the same reason as above, i.e.,  $\gamma_v$  is injective, exactly those walks  
 690 in  $\hat{\mathcal{W}}[Y_u, Y_v, \{s\}]$  are mapped by  $\gamma_v$  to walks in  $\mathcal{W}[u, v, s]$ , and all walks in  $\mathcal{W}[u, v, s]$  that have no  
 691 preimage in  $\hat{\mathcal{W}}[Y_u, Y_v, \{s\}]$  are zero-valued by  $f_v$ . The third inequality holds by the fact that every  
 692 walk that is considered in the sum can be partitioned into  $\hat{W}[Y_u, Y_v]$  and  $\hat{W}[Y_v, \{s\}]$ . The fourth  
 693 equality follows from factoring out by the subwalks. The fifth equality follows from the fact that  
 694 every walk in  $\hat{\mathcal{W}}$  reaches some sink node eventually, and therefore, the additional factor in the first  
 695 bracket sums up to one. Lastly, the sixth equality follows from the very same argument as before.

From the above equation we get in particular that for every  $u, v \in N, s \in S$  it holds that

$$\mathbb{P}_{W \sim f_u}[s \in W \mid v \in W] = \frac{\mathbb{P}_{W \sim f_u}[s \in W \wedge v \in W]}{\mathbb{P}_{W \sim f_u}[v \in W]} = \mathbb{P}_{W \sim f_v}[s \in W].$$

696 This concludes the proof. □

The next axiom was in its essence first introduced by Behrens and Swierczek [2015] and first given the name *guru-participation* in Kotsialou and Riley [2020]. The idea is that a representative (the *guru*) of a voter, should not be worse off if said voter abstains from the vote. Brill et al. [2022] define this property for non-fractional ranked delegations by requiring that any casting voter that was not a representative of the newly abstaining voter should not loose voting weight. This definition translates well into the setting of fractional delegations where we can have multiple representatives per voter. For simplicity, we made a slight modification to the definition<sup>12</sup>, resulting in a slightly stronger axiom.

Previously, we stated the general assumption that every delegating voter in a delegation graph  $(G, c)$  has a path to some casting voter in  $G$ . In this section we modify given delegation graphs by removing nodes or edges, which may result in an invalid delegation graph not satisfying this assumption. To prevent this, we implicitly assume that after modifying a delegation graph, all nodes in  $N$  not connected to any sink in  $S$  (we call them *isolated*) are removed from the graph.

**Guru Participation:** A delegation rule satisfies *guru-participation* if the following holds for every instance  $(G, c)$ : Let  $(\hat{G}, c)$  be the instance derived from  $(G, c)$  by removing a node  $v \in N$  (and all newly isolated nodes), let  $S_v = \{s \in S \mid A_{v,s} > 0\}$  be the set of representatives of  $v$  and let  $A$  and  $\hat{A}$  be the assignments returned by the delegation rule for  $(G, c)$  and  $(\hat{G}, c)$ , respectively. Then

$$\pi_s(\hat{A}) \geq \pi_s(A) \quad \forall s \in S \setminus S_v \quad .$$

In particular, this implies

$$\sum_{s \in S_v} \pi_s(\hat{A}) + 1 \leq \sum_{s \in S_v} \pi_s(A) \quad .$$

In order to prove that the RANDOM WALK RULE satisfies *guru-participation* we first show the following lemma, saying that the voting weight of no casting voter decreases, when the in-edges of another casting voter are removed from the graph.

**Lemma C.1.** *For the RANDOM WALK RULE, removing the incoming edges of some casting voter  $s \in S$  (and all newly isolated voters) does not decrease the absolute voting weight of any casting voter  $s' \in S \setminus \{s\}$ .*

*Proof.* Let  $(G, c)$  be a delegation graph and  $s \in S$  a sink. Let  $(\hat{G}, c)$  be the delegation graph, where the in-edges of  $s$  and all voters disconnected from casting voters are removed. Let  $P^{(\varepsilon)}$  and  $\hat{P}^{(\varepsilon)}$  be the transition matrices of the corresponding Markov chains  $M_\varepsilon$  and  $\hat{M}_\varepsilon$ . Then, for any  $\varepsilon > 0$  and edge  $e$  in  $\hat{G}$  we have  $P_e^{(\varepsilon)} \leq \hat{P}_e^{(\varepsilon)}$ . Since no edge on a path from any  $v \in N$  to any  $s' \in S \setminus \{s\}$  was removed, we have  $\hat{W}[v, s'] = W[v, s']$  and  $\hat{P}_e^{(\varepsilon)} \geq P_e^{(\varepsilon)}$  for every edge  $e$  in  $\hat{G}$  and  $\varepsilon > 0$ . Therefore, for the absolute voting weight of any  $s' \in S \setminus \{s\}$  in  $\hat{G}$  we get

$$\pi_{s'}(\hat{A}) = 1 + \sum_{v \in N} \lim_{\varepsilon \rightarrow 0} \sum_{\hat{W} \in \hat{W}[v, s']} \prod_{e \in \hat{W}} P_e^{(\varepsilon)} \geq 1 + \sum_{v \in N} \lim_{\varepsilon \rightarrow 0} \sum_{W \in W[v, s']} \prod_{e \in W} P_e^{(\varepsilon)} = \pi_{s'}(A) \quad ,$$

which concludes the proof.  $\square$

Using Lemma C.1 and the proof of Theorem 7, we can show that *guru-participation* is satisfied by the RANDOM WALK RULE by removing a delegating voter step by step.

**Theorem C.2.** *The RANDOM WALK RULE satisfies *guru participation*.*

*Proof.* Let  $(G, c)$  be a delegation graph and  $v \in N$  a delegating voter. We remove  $v$  from  $G$  in three steps. First, we remove all out-edges of  $v$ , making  $v$  a casting voter and call the new delegation graph  $(\hat{G}_1, c)$ . Then we remove the in-edges of  $v$  (and all newly isolated voters) and get  $(\hat{G}_2, c)$ . Finally, we remove  $v$  itself to retrieve  $(\hat{G}, c)$  as in the definition of *guru-participation*. Let  $A, \hat{A}_1, \hat{A}_2$  and  $\hat{A}$  be the assignments returned by the RANDOM WALK RULE for  $(g, c)$ ,  $(\hat{G}_1, c)$ ,  $(\hat{G}_2, c)$  and  $(\hat{G}, c)$ , respectively. From the proof of Theorem 7 we know that for every casting voter  $s \in S \setminus S_v$  the voting weight in the instances  $(G, c)$  and  $(\hat{G}_1, c)$  is equal, i.e.,  $\pi_s(\hat{A}_1) = \pi_s(A)$ . From Lemma

<sup>12</sup>More specifically, Brill et al. [2022] use the notion of *relative* voting weight between the casting voters in the definition of the axiom, which follows from our version of the axiom using absolute voting weight.

738 **C.1** it follows that the voting weight of these voters can only increase if also the in-edges of  $v$  are  
 739 removed, i.e.,  $\pi_s(\hat{A}_2) \geq \pi_s(\hat{A}_1)$ . Finally, removing the now completely isolated (now casting) voter  
 740  $v$  does not change the absolute voting weight of any other voter and therefore  $\pi_s(\hat{A}) \geq \pi_s(A)$ .  $\square$

741 **Top-rank priority:** For any delegation graph and output of the delegation rule  $A$ , if voter  $v \in N$  has  
 742 exactly one outgoing edge of cost 1 and that edge ends in a casting voter  $s \in S$ , then  $A_{v,s} = 1$ .

743 **Theorem C.3.** MIXED BORDA BRANCHING *satisfies top-rank priority.*

744 *Proof.* Let  $G$ ,  $v$  and  $s$  be defined as above. We show that for the assignment returned by MIXED  
 745 BORDA BRANCHING  $A_{v,s} = 1$  by showing that every Borda branching contains the edge  $(v, s)$ .  
 746 Suppose there is a Borda branching  $B'$  with  $(v, s) \notin B'$ , then we construct a new branching  $\hat{B}$  by  
 747 removing the out-edge of  $v$  from  $B'$  and adding  $(v, s)$  instead.  $\hat{B}$  is a branching, since no cycles can  
 748 be introduced by adding an edge to a sink and  $|\hat{B}| = |B'|$ . Since  $v$  has only one outgoing edge of cost  
 749 one,  $\hat{B}$  has lower total cost than  $B'$ , contradicting the assumption that  $B'$  is a Borda branching.  $\square$

## 750 **D Broader Impact**

751 We are aware of the fact that any delegation rule, and in particular the one suggested in this paper,  
 752 may be implemented in a liquid democracy system and could thereby have real world impact. In this  
 753 paper, we chose the axiomatic method in order to evaluate the suggested rule in a principled way.  
 754 While, with respect to the axioms considered in the literature so far, our delegation rule performs  
 755 very well, we want to point out that this is the very first paper introducing fractional delegation rules  
 756 for ranked delegations. In particular, there is a risk of some unforeseen disadvantages of the rule  
 757 that could possibly be used for manipulations or lead to other negative societal effects. Therefore,  
 758 we think that further theoretical and also empirical research is necessary before recommending our  
 759 suggested delegation rule for (high-stake) real-world decision making.
